# Supplementary material for: Global deceleration of gene evolution following recent genome hybridizations in fungi
Source: HighWire-hosted journal article supplement (doi:10.1101/gr.205948.116), 2016-07-20
Supplement: Supplemental_Table_S1.xlsx [file Supplemental_Table_S1.xlsx]

## Sheet: Sheet2
Supplemental Table S1. Genome statistics for Trichosporon species.
Scientific Name	T. asahii	T. faecale	T. coremiiforme	T. inkin	T. ovoides
Contig / Scaffold Count	342a	32b	190b	18b	116b
Total Length (bases)	24303836	24653913	42353277	20340329	40322879
N50 (bases)	151096	3676950	1468092	2739924	2824449
Maximum Length (bases)	463490	4840925	2459564	3668652	3718678
Average Length (bases)	71064	770435	222912	1130018	347611
REAPRc Total Length (bases)	N/A	24678697	42568997	20447529	40450917
REAPRc N50 (bases)	N/A	2479610	1457339	2706222	2605587
REAPRc Maximum Length (bases)	N/A	4472061	2459564	3669090	3718887
REAPRc Average Length (bases)	N/A	587588	161246	335205	243680
CEGMAd Complete	N/A	230	227	225	234
CEGMAd Complete (%)	N/A	92.74	91.53	90.73	94.35
CEGMAd Partial	N/A	7	7	7	4
CEGMAd Complete Total	N/A	243	441	237	451
CEGMAd % Orthologous	N/A	5.22	86.34	4	84.19
Strain Number	CBS 2479	JCM 2941	JCM 2938	JCM 9195	JCM 9940
NCBI Accession ID / Reference	Yang et al. (1)	JXYK00000000	JXYL00000000	JXYM00000000	JXYN00000000
Predicted Protein-Coding Genes	8,068a	7,804e	13,398e	6,733e	12,877e
a Number of contigs and genes as reported in Yang et al. (Yang et al. 2012)
b Number of scaffolds generated from ALLPATHS-LG (see Methods)
c Statistics of the broken genome assemblies made by REAPR (see Methods)
d Statistics of identified core eukaryotic genes made by CEGMA (see Methods)
e Number of genes predicted using GeneMark (see Methods)
