# Supplementary material for: Global deceleration of gene evolution following recent genome hybridizations in fungi
Source: HighWire-hosted journal article supplement (doi:10.1101/gr.205948.116), 2016-07-20
Supplement: Supplemental_Table_S2.xlsx [file Supplemental_Table_S2.xlsx]

## Sheet: Sheet1
Supplemental Table S2. List of protein complexes containing at least 2 single-copy genes in T. coremiiforme.
Complex Name	T. coremiiforme Gene Count
	Mapped Total	Single-Copy	Two-Copy
*19/22S regulator	17	3	14
*20S proteasome	13	3	10
Carbamoyl-phosphate synthase complex	2	2	0
Chaperonin-containing T-complex	7	2	5
*Commitment complexa	3	2	1
*Cytoplasmic ribosomal large subunita	32	19	13
*Cytoplasmic ribosomal small subunita	23	8	15
*DNA-directed RNA polymerase II complexa	7	3	4
eIF3a	4	3	1
EKC/KEOPS protein complexa	3	2	1
*F0/F1 ATP synthase (complex V)	6	2	4
Geranylgeranyltransferase II (GGTase II)	2	2	0
Glycine cleavage complex	4	3	1
HOPS complex	4	2	2
Luminal surveillance complex	2	2	0
*Mcm2-7 complexa	6	2	4
mRNA cleavage and polyadenylation specificity factor complexa	9	3	6
*Multi-eIF complexa	6	3	3
*NuA4 histone acetyltransferase complex	6	2	4
Nucleotide-excision repair factor 2 complex	2	2	0
PAM complex	4	2	2
*SAGA complex	8	2	6
Snf1p/Snf4p/Sip2p complex	3	2	1
*Swr1p complex	4	2	2
*U2 snRNP complexa	6	2	4
*U4/U6 x U5 tri-snRNP complexa	8	2	6
UTP B complex	5	2	3
* Overlap with protein complexes containing at least two single-copy genes in T. ovoides (14 out of 27 complexes).
a Protein complexes directly involved in transcription and translation (11 out of 27 complexes).
