# Supplementary material for: Global deceleration of gene evolution following recent genome hybridizations in fungi
Source: HighWire-hosted journal article supplement (doi:10.1101/gr.205948.116), 2016-07-20
Supplement: Supplemental_Table_S3.xlsx [file Supplemental_Table_S3.xlsx]

## Sheet: Sheet1
Supplemental Table S3. List of protein complexes containing at least 2 single-copy genes in T. ovoides.
Complex Name	T. Ovoides Gene Count
	Mapped Total	Single-Copy	Two-Copy
*19/22S regulator	17	2	15
*20S proteasome	13	5	8
Acetolactate synthase complex	2	2	0
Alpha DNA polymerase:primase complexa	4	2	2
Anaphase-promoting complex	6	2	4
AP-1 adaptor complex	4	2	2
Box C/D snoRNP complex	3	2	1
cAMP-dependent protein kinase	3	2	1
Car1p/Arg3p complex	2	2	0
*Commitment complexa	4	2	2
COMPASS complex	2	2	0
COPI	5	3	2
*Cytoplasmic ribosomal large subunita	35	9	26
*Cytoplasmic ribosomal small subunita	24	7	17
DNA polymerase delta complex	2	2	0
*DNA-directed RNA polymerase II complexa	7	2	5
DNA-directed RNA polymerase III complexa	6	2	4
eIF2Ba	5	2	3
Exocyst complex	6	3	3
*F0/F1 ATP synthase (complex V)	7	2	5
GPI-anchor transamidase complex	4	4	0
H+-transporting ATPase	6	2	4
Hse1p/Vps27p complex	2	2	0
Ino80p complex	6	4	2
*Mcm2-7 complexa	6	2	4
Mgm1p/Ugo1p/Fzo1p complex	2	2	0
Mot1p complexa	2	2	0
*Multi-eIF complexa	6	2	4
*NuA4 histone acetyltransferase complex	6	4	2
Nuclear exosome complex	5	2	3
Nucleotide-excision repair factor 3 complex	5	2	3
Protein O-mannosyltransferase(Pmt1p/Pmt2p)	2	2	0
RING finger peroxin complex	2	2	0
Rpd3S complex	4	2	2
*SAGA complex	8	2	6
Serine C-palmitoyltransferase complex	2	2	0
*Swr1p complex	5	4	1
Transcription factor TFIID complexa	5	2	3
Transcription factor TFIIH complexa	6	2	4
Transcription factor TFIIIC complexa	2	2	0
U1 snRNP complexa	3	2	1
*U2 snRNP complexa	7	2	5
*U4/U6 x U5 tri-snRNP complexa	9	4	5
U5 snRNP complexa	4	4	0
* Overlap with protein complexes containing at least two single-copy genes in T. coremiiforme (14 out of 44 complexes).
a Protein complexes directly involved in transcription and translation (17 out of 44 complexes).
