# Supplementary material for: Global deceleration of gene evolution following recent genome hybridizations in fungi
Source: HighWire-hosted journal article supplement (doi:10.1101/gr.205948.116), 2016-07-20
Supplement: Supplemental_Table_S4.xlsx [file Supplemental_Table_S4.xlsx]

## Sheet: Sheet1
Supplemental Table S4. Detailed gene loss data for cytoplasmic ribosomal subunits.
Gene Information		T. coremiiforme		T. ovoides
Name	Subunit	Statusa	Subgenomeb	Statusa	Subgenomeb	Supportc
RPL1A	Large
RPL2B	Large	Single	A	Single	No Data	N/A
RPL3	Large	Two-Copy		Two-Copy
RPL4B	Large	Single	B	Two-Copy
RPL5	Large	Two-Copy		Two-Copy
RPL6B	Large	Two-Copy		Two-Copy
RPL7A	Large	Two-Copy		Two-Copy
RPL8A	Large	Two-Copy		Two-Copy
RPL9A	Large
RPL10	Large			Single	A	19/20
RPL11B	Large	Single	No Datad	Two-Copy
RPL12A	Large	Two-Copy		Two-Copy
RPL13A	Large	Single	No Data	Two-Copy
RPL14B	Large			Two-Copy
RPL15B	Large	Two-Copy		Two-Copy
RPL16B	Large			Single	A	19/20
RPL17B	Large	Single	No Data	Single	A	20/20
RPL18A	Large	Single	No Data	Two-Copy
RPL19A	Large	Single	A	Two-Copy
RPL20B	Large	Single	B	Two-Copy
RPL21A	Large	Single	No Data	Two-Copy
RPL23B	Large	Single	A	Two-Copy
RPL24B	Large	Single	A	Single	A	18/20
RPL25	Large	Two-Copy		Two-Copy
RPL27A	Large	Single	B	Two-Copy
RPL28	Large	Two-Copy		Two-Copy
RPL30	Large	Two-Copy		Two-Copy
RPL31B	Large	Single	A	Two-Copy
RPL32	Large	Single	No Data	Two-Copy
RPL33B	Large	Two-Copy		Two-Copy
RPL34A	Large	Single	A	Single	A	20/20
RPL35A	Large	Single	B	Single	A	18/20
RPL36A	Large	Single	No Data	Two-Copy
RPL40B	Large
RPL42A	Large	Two-Copy		Single	B	19/20
RPP0	Large	Single	B	Two-Copy
RPP1B	Large	Single	A	Single	A	20/20
RPP2B	Large	Two-Copy		Two-Copy
ASC1	Small	Two-Copy		Two-Copy
RPS0A	Small	Single	No Data	Two-Copy
RPS1B	Small	Two-Copy		Single	A	18/20
RPS2	Small	Two-Copy		Two-Copy
RPS3	Small	Two-Copy		Two-Copy
RPS4A	Small	Single	A	Two-Copy
RPS5	Small	Single	A	Two-Copy
RPS6A	Small	Two-Copy		Two-Copy
RPS7B	Small	Two-Copy		Two-Copy
RPS8B	Small	Two-Copy		Two-Copy
RPS9B	Small	Single	No Data	Two-Copy
RPS10B	Small			Two-Copy
RPS11A	Small	Single	A	Single	B	19/20
RPS12	Small	Two-Copy		Single	No Data	N/A
RPS13	Small	Two-Copy		Two-Copy
RPS14A	Small	Two-Copy		Single	No Data	N/A
RPS15	Small	Single	B	Two-Copy
RPS16A	Small	Two-Copy		Two-Copy
RPS17B	Small	Single	No Data	Single	A	19/20
RPS18B	Small	Two-Copy		Two-Copy
RPS19B	Small	Two-Copy		Single	B	20/20
RPS20	Small	Two-Copy		Two-Copy
RPS21B	Small
RPS22A	Small
RPS23B	Small	Two-Copy		Single	A	20/20
RPS24B	Small	Single	No Data	Two-Copy
a Status represents the number of orthologs found in each genome. When no ortholog is found, the row is left blank.
b T. coremiiforme single-copy genes were assigned to subgenomes based on scaffold identity (all genes on each scaffold are assigned to the same subgenome).
T. ovoides single-copy genes were assigned to subgenomes based on the majority subgenome assignments of their 20-nearest two-copy neighbors (see Methods).
c Supports for T. ovoides subgenome assignment are the number of majority subgenome among 20 nearest two-copy genes.
d Genes belonging to scaffolds which do not contain any genes with subgenome assignments were labeled as “No Data”.
